# Supplementary material for: Vertically aligned MoS2nanosheets on monodisperse MXene as electrolyte-philic cathodes for zinc ion batteries with enhanced capacity
Source: Royal Society of Chemistry journal article supplement (doi:10.1039/d3ra02352d), 2023-01-01
Supplement: d3ra02352d1.pdf [file d3ra02352d1.pdf]

## Supporting Information

### Vertically aligned MoS<sub>2</sub> Nanosheets on Monodisperse MXene as Electrolyte-Philic Cathode for Zinc Ion Battery with Enhanced Capacity

Wanting Su<sup>‡</sup>, Man Lang<sup>‡</sup>, Qingxiao Zhang, Yanan Yang, Weiwei Li, Huili Li\* and Fang Zhang\*

Key Laboratory of Resource Chemistry, Joint International Research Laboratory of Resource Chemistry, Ministry of Education, College of Chemistry and Materials Science, Shanghai Normal University, Shanghai 200234, China.

\*E-mail addresses: li\_huili@shnu.edu.cn; zhangfang@shnu.edu.cn.

<sup>‡</sup>Wanting Su and Man Lang contributed equally to this work.

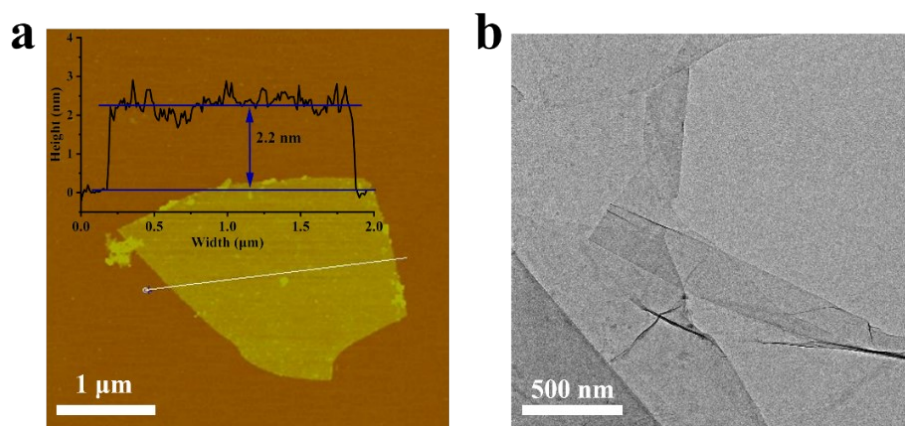

**Figure S1.** (a) AFM and (b) TEM images of Ti<sub>3</sub>C<sub>2</sub>T<sub>x</sub> MXene.

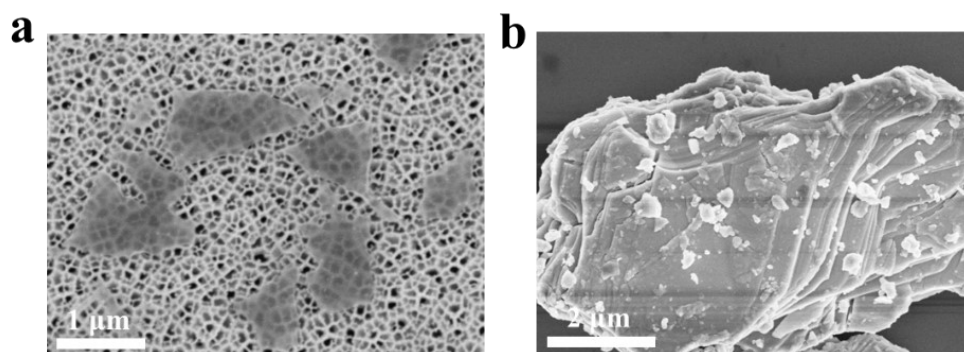

**Figure S2.** SEM images of (a) Ti<sub>3</sub>C<sub>2</sub>T<sub>x</sub> MXene and (b) Ti<sub>3</sub>AlC<sub>2</sub> MAX.

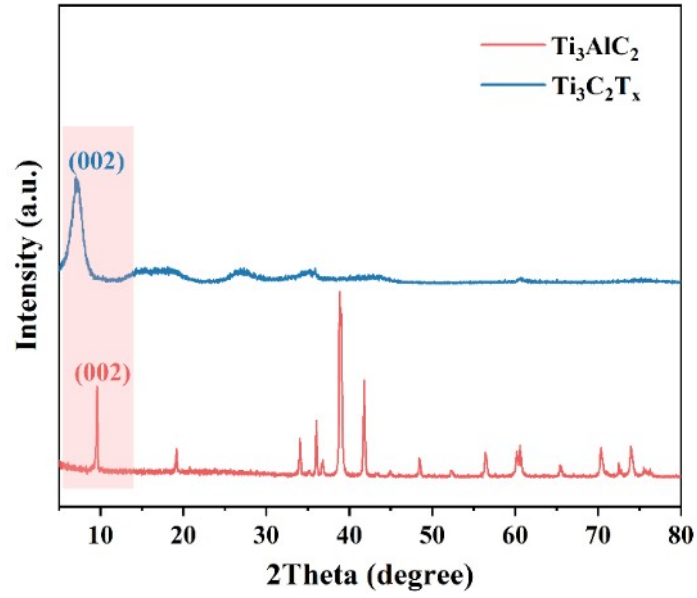

**Figure S3.** XRD patterns of  $\text{Ti}_3\text{AlC}_2$  and  $\text{Ti}_3\text{C}_2\text{T}_x$  MXene.

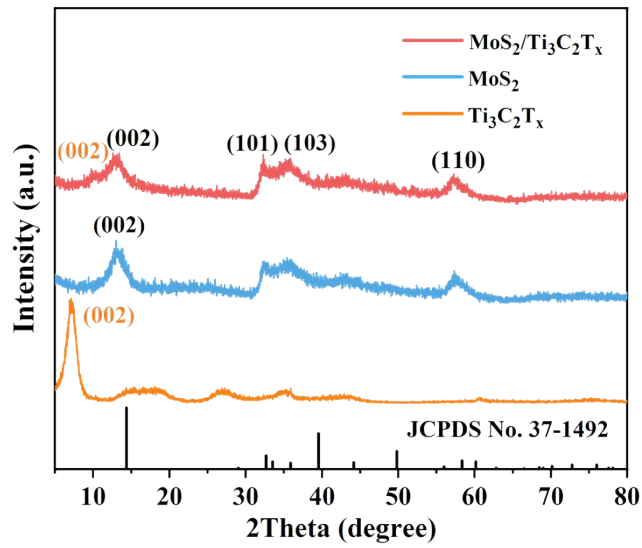

**Figure S4.** XRD patterns of  $\text{MoS}_2$  and  $\text{MoS}_2/\text{Ti}_3\text{C}_2\text{T}_x$  composites.

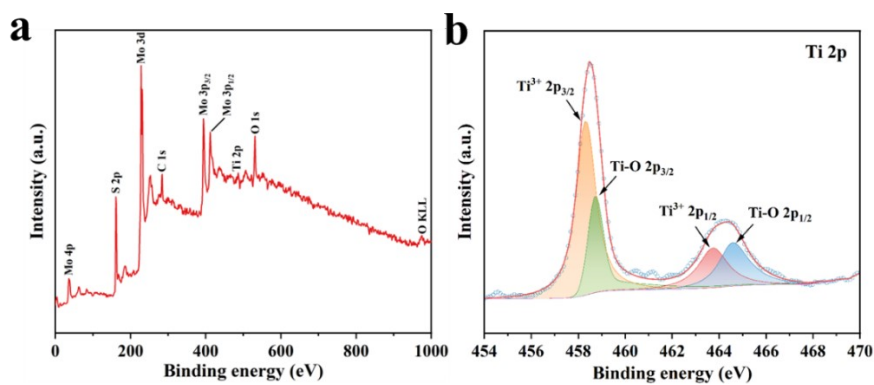

**Figure S5.** (a) XPS spectrum of MoS<sub>2</sub>/Ti<sub>3</sub>C<sub>2</sub>T<sub>x</sub> MXene. (b) The high-resolution XPS spectrum of Ti 2p in the (a).

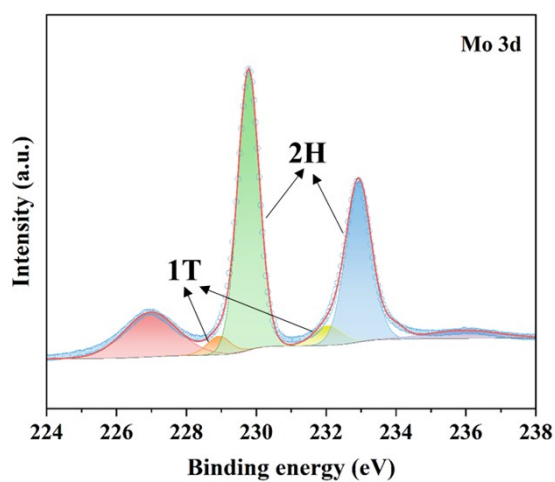

**Figure S6.** The high-resolution XPS spectrum of Mo 3d in the commercial MoS<sub>2</sub>.

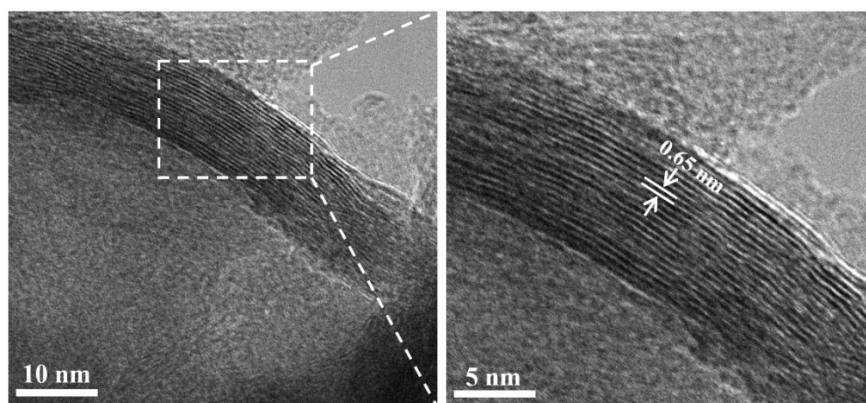

**Figure S7.** TEM images of MoS<sub>2</sub>.

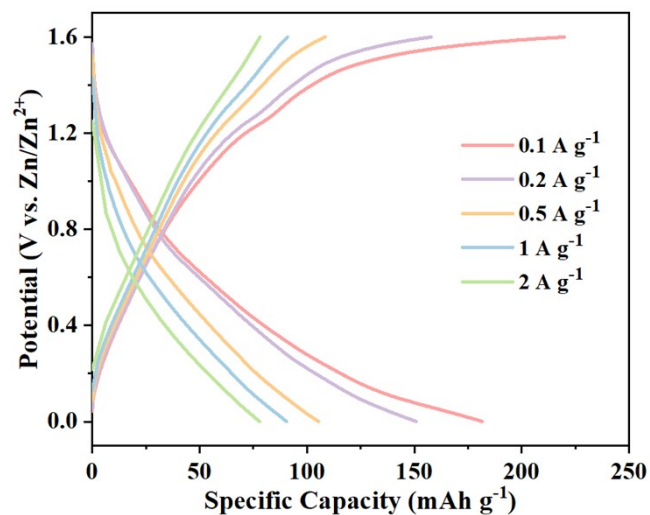

**Figure S8.** The galvanotactic charge/discharge curves of Zn//MoS<sub>2</sub> batteries under various current densities.

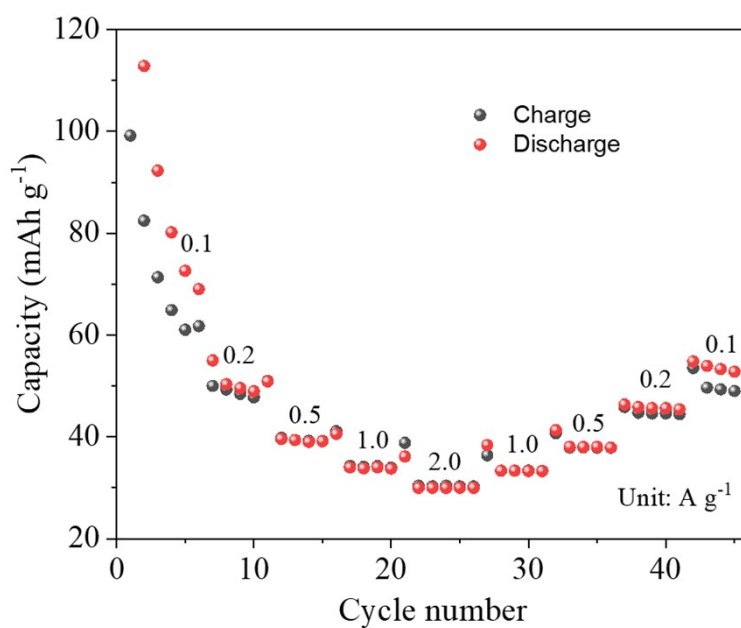

**Figure S9.** Rate capability of Zn//MoS<sub>2</sub>/Ti<sub>3</sub>C<sub>2</sub>T<sub>x</sub> batteries with 1 mol L<sup>-1</sup> Zn(CF<sub>3</sub>SO<sub>3</sub>)<sub>2</sub> electrolyte under various current densities.

**Table S1.** Discharge capacity of ZIBs compared with the values reported from other MoS<sub>2</sub> based ZIBs.

| Cathode materials                                               | Voltage window | Discharge capacity                                                                                                                                                                                                                                                   | Ref.      |
|-----------------------------------------------------------------|----------------|----------------------------------------------------------------------------------------------------------------------------------------------------------------------------------------------------------------------------------------------------------------------|-----------|
| MoS <sub>2</sub> -CC                                            | 0.25-1.25 V    | 198 mAh g <sup>-1</sup> at 0.1 A g <sup>-1</sup> , 180 mAh g <sup>-1</sup> at 0.2 A g <sup>-1</sup><br>151 mAh g <sup>-1</sup> at 0.5 A g <sup>-1</sup> , 127 mAh g <sup>-1</sup> at 1 A g <sup>-1</sup><br>100 mAh g <sup>-1</sup> at 2 A g <sup>-1</sup>           | [1]       |
| MoS <sub>2</sub> ·nH <sub>2</sub> O                             | 0.2-1.5 V      | 165 mAh g <sup>-1</sup> at 0.1 A g <sup>-1</sup> , 146 mAh g <sup>-1</sup> at 0.2 A g <sup>-1</sup><br>122 mAh g <sup>-1</sup> at 0.5 A g <sup>-1</sup> , 100 mAh g <sup>-1</sup> at 1 A g <sup>-1</sup><br>75 mAh g <sup>-1</sup> at 2 A g <sup>-1</sup>            | [2]       |
| MoS <sub>2</sub> /CF                                            | 0.2-1.3 V      | 182 mAh g <sup>-1</sup> at 0.1 A g <sup>-1</sup> , 169 mAh g <sup>-1</sup> at 0.2 A g <sup>-1</sup><br>149 mAh g <sup>-1</sup> at 0.5 A g <sup>-1</sup> , 131 mAh g <sup>-1</sup> at 1 A g <sup>-1</sup><br>110 mAh g <sup>-1</sup> at 2 A g <sup>-1</sup>           | [3]       |
| MoS <sub>2</sub> @CNTs                                          | 0.3-1.2 V      | 180.0 mAh g <sup>-1</sup> at 0.1 A g <sup>-1</sup> , 144.5 mAh g <sup>-1</sup> at 0.2 A g <sup>-1</sup><br>126.7 mAh g <sup>-1</sup> at 0.5 A g <sup>-1</sup> , 112.8 mAh g <sup>-1</sup> at 1 A g <sup>-1</sup><br>102.3 mAh g <sup>-1</sup> at 2 A g <sup>-1</sup> | [4]       |
| MoS <sub>2</sub> /PANI                                          | 0.2-1.3 V      | 181.6 mAh g <sup>-1</sup> at 0.1 A g <sup>-1</sup> , 152.1 mAh g <sup>-1</sup> at 0.2 A g <sup>-1</sup><br>130.3 mAh g <sup>-1</sup> at 0.5 A g <sup>-1</sup> , 106.1 mAh g <sup>-1</sup> at 1 A g <sup>-1</sup><br>83.2 mAh g <sup>-1</sup> at 2 A g <sup>-1</sup>  | [5]       |
| MoS <sub>2-x</sub>                                              | 0.25-1.25 V    | 138.6 mAh g <sup>-1</sup> at 0.1 A g <sup>-1</sup> , 125.5 mAh g <sup>-1</sup> at 0.2 A g <sup>-1</sup><br>112.8 mAh g <sup>-1</sup> at 0.5 A g <sup>-1</sup> , 95.6 mAh g <sup>-1</sup> at 1 A g <sup>-1</sup><br>80.8 mAh g <sup>-1</sup> at 2 A g <sup>-1</sup>   | [6]       |
| MoS <sub>2</sub>                                                | 0.25-1.25 V    | 168 mAh g <sup>-1</sup> at 0.1 A g <sup>-1</sup> , 151 mAh g <sup>-1</sup> at 0.2 A g <sup>-1</sup><br>134 mAh g <sup>-1</sup> at 0.5 A g <sup>-1</sup> , 119 mAh g <sup>-1</sup> at 1 A g <sup>-1</sup><br>104 mAh g <sup>-1</sup> at 2 A g <sup>-1</sup>           | [7]       |
| 1T-MoS <sub>2</sub>                                             | 0.25-1.25 V    | 164.1 mAh g <sup>-1</sup> at 0.1 A g <sup>-1</sup> , 149.5 mAh g <sup>-1</sup> at 0.2 A g <sup>-1</sup><br>140.8 mAh g <sup>-1</sup> at 0.5 A g <sup>-1</sup> , 133.2 mAh g <sup>-1</sup> at 1 A g <sup>-1</sup><br>120.1 mAh g <sup>-1</sup> at 2 A g <sup>-1</sup> | [8]       |
| C-MoS <sub>2</sub> -NC                                          | 0.2-1.4 V      | 249.7 mAh g <sup>-1</sup> at 0.1 A g <sup>-1</sup> , 219.9 mAh g <sup>-1</sup> at 0.2 A g <sup>-1</sup><br>199.7 mAh g <sup>-1</sup> at 0.5 A g <sup>-1</sup> , 171.7 mAh g <sup>-1</sup> at 1 A g <sup>-1</sup><br>152.8 mAh g <sup>-1</sup> at 2 A g <sup>-1</sup> | [9]       |
| MoS <sub>2</sub> -CTAB                                          | 0.2-1.3 V      | 197.9 mAh g <sup>-1</sup> at 0.1 A g <sup>-1</sup> , 179.3 mAh g <sup>-1</sup> at 0.2 A g <sup>-1</sup><br>157.3 mAh g <sup>-1</sup> at 0.5 A g <sup>-1</sup> , 137.6 mAh g <sup>-1</sup> at 1 A g <sup>-1</sup><br>118.8 mAh g <sup>-1</sup> at 2 A g <sup>-1</sup> | [10]      |
| N-doped 1T-MoS <sub>2</sub>                                     | 0.2-1.3 V      | 149.6 mAh g <sup>-1</sup> at 0.1 A g <sup>-1</sup> , 143 mAh g <sup>-1</sup> at 0.2 A g <sup>-1</sup><br>133.1 mAh g <sup>-1</sup> at 0.5 A g <sup>-1</sup> , 124.4 mAh g <sup>-1</sup> at 1 A g <sup>-1</sup><br>115.1 mAh g <sup>-1</sup> at 2 A g <sup>-1</sup>   | [11]      |
| MoS <sub>2</sub>                                                | 0.3-1.3 V      | 191.2 mAh g <sup>-1</sup> at 0.1 A g <sup>-1</sup> , 177.4 mAh g <sup>-1</sup> at 0.2 A g <sup>-1</sup><br>162.9 mAh g <sup>-1</sup> at 0.5 A g <sup>-1</sup> , 146.2 mAh g <sup>-1</sup> at 1 A g <sup>-1</sup><br>129.6 mAh g <sup>-1</sup> at 2 A g <sup>-1</sup> | [12]      |
| MoS <sub>2</sub> -O                                             | 0.2-1.3 V      | 191.2 mAh g <sup>-1</sup> at 0.1 A g <sup>-1</sup> , 177.4 mAh g <sup>-1</sup> at 0.2 A g <sup>-1</sup><br>162.9 mAh g <sup>-1</sup> at 0.5 A g <sup>-1</sup> , 146.2 mAh g <sup>-1</sup> at 1 A g <sup>-1</sup><br>129.6 mAh g <sup>-1</sup> at 2 A g <sup>-1</sup> | [13]      |
| Glu-MoS <sub>2</sub>                                            | 0.3-1.5 V      | 182 mAh g <sup>-1</sup> at 0.1 A g <sup>-1</sup> , 121 mAh g <sup>-1</sup> at 0.3 A g <sup>-1</sup><br>93 mAh g <sup>-1</sup> at 0.5 A g <sup>-1</sup> , 68 mAh g <sup>-1</sup> at 0.8 A g <sup>-1</sup><br>52 mAh g <sup>-1</sup> at 1 A g <sup>-1</sup>            | [14]      |
| 1T MoS <sub>2</sub> /MWCNT                                      | 0.2-1.3 V      | 160.3 mAh g <sup>-1</sup> at 0.1 A g <sup>-1</sup> , 145.2 mAh g <sup>-1</sup> at 0.3 A g <sup>-1</sup><br>129.3 mAh g <sup>-1</sup> at 0.5 A g <sup>-1</sup> , 107.4 mAh g <sup>-1</sup> at 1 A g <sup>-1</sup>                                                     | [15]      |
| MoS <sub>2</sub> /Ti <sub>3</sub> C <sub>2</sub> T <sub>x</sub> | 0-1.6 V        | 277 mAh g <sup>-1</sup> at 0.1 A g <sup>-1</sup> , 228 mAh g <sup>-1</sup> at 0.2 A g <sup>-1</sup><br>176 mAh g <sup>-1</sup> at 0.5 A g <sup>-1</sup> , 139 mAh g <sup>-1</sup> at 1 A g <sup>-1</sup><br>106 mAh g <sup>-1</sup> at 2 A g <sup>-1</sup>           | This work |

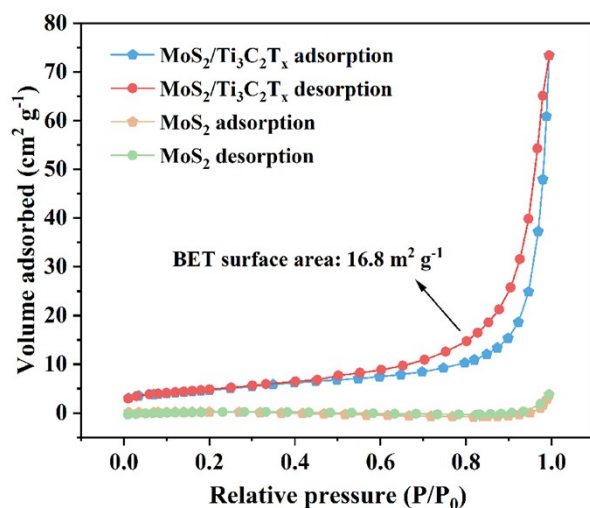

**Figure S10.** N<sub>2</sub> adsorption-desorption isotherm of MoS<sub>2</sub> and MoS<sub>2</sub>/Ti<sub>3</sub>C<sub>2</sub>T<sub>x</sub> MXene composites.

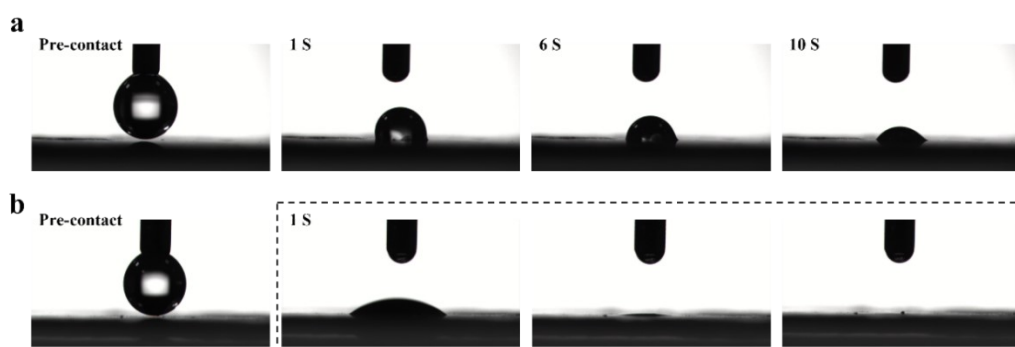

**Figure S11.** Water contact angles of a) MoS<sub>2</sub> and b) MoS<sub>2</sub>/Ti<sub>3</sub>C<sub>2</sub>T<sub>x</sub> MXene composites.

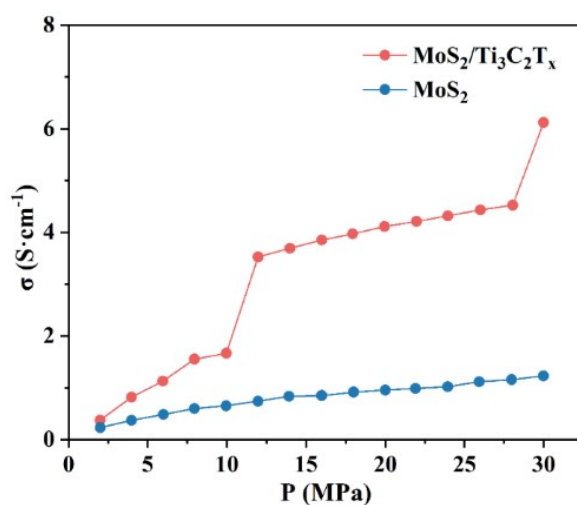

**Figure S12.** Electronic conductivity of MoS<sub>2</sub>/Ti<sub>3</sub>C<sub>2</sub>T<sub>x</sub> composites and MoS<sub>2</sub>.

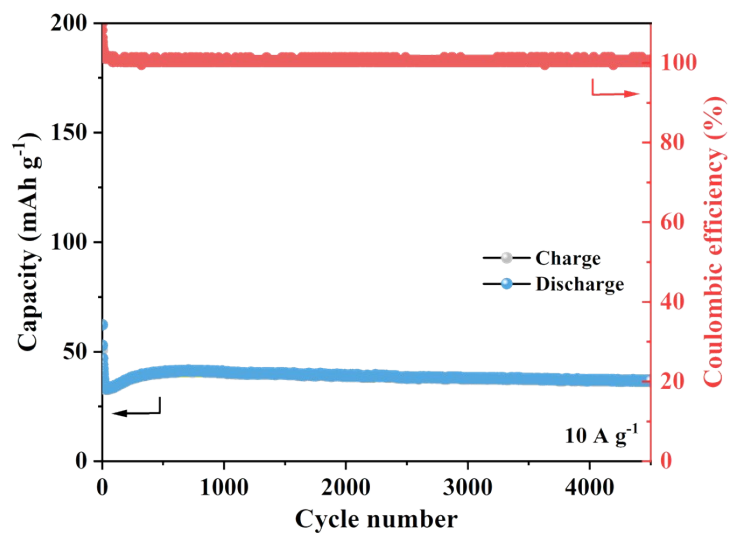

**Figure S13.** Long cycling performance of Zn//MoS<sub>2</sub>/Ti<sub>3</sub>C<sub>2</sub>T<sub>x</sub> batteries at 10.0 A g<sup>-1</sup>.

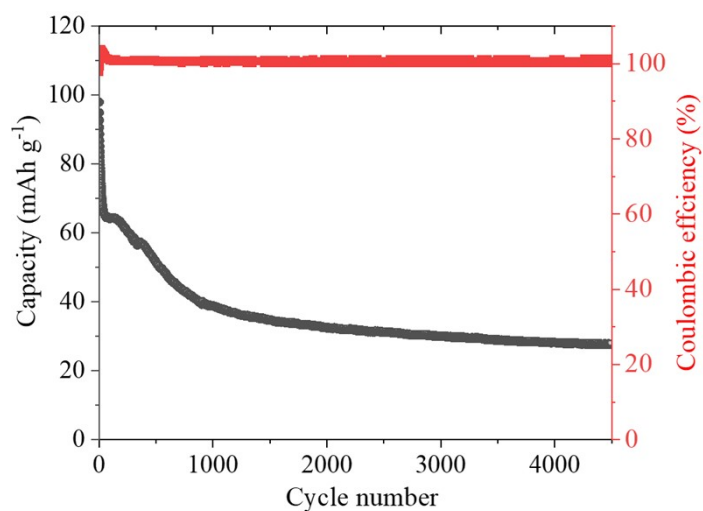

**Figure S14.** Long cycling performance of Zn//MoS<sub>2</sub>/Ti<sub>3</sub>C<sub>2</sub>T<sub>x</sub> batteries with 1 mol L<sup>-1</sup> Zn(CF<sub>3</sub>SO<sub>3</sub>)<sub>2</sub> electrolyte at 10.0 A g<sup>-1</sup>.

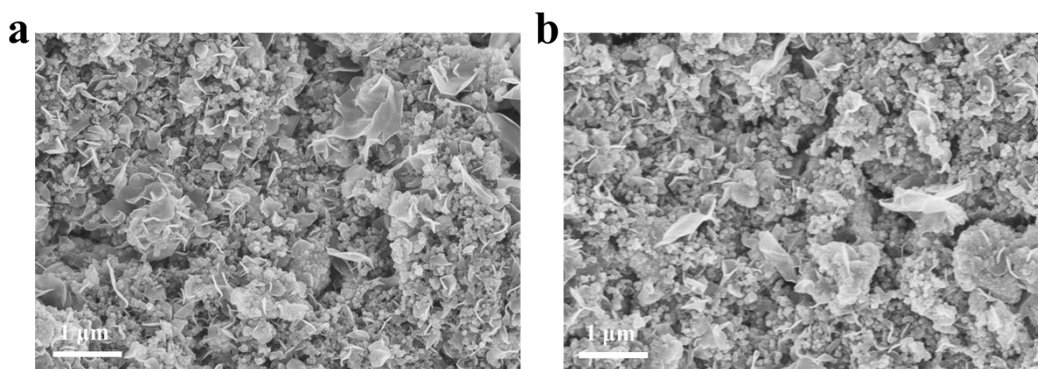

**Figure S15.** SEM images of the MoS<sub>2</sub>/Ti<sub>3</sub>C<sub>2</sub>T<sub>x</sub> MXene electrode (a) before and (b) after cycles.

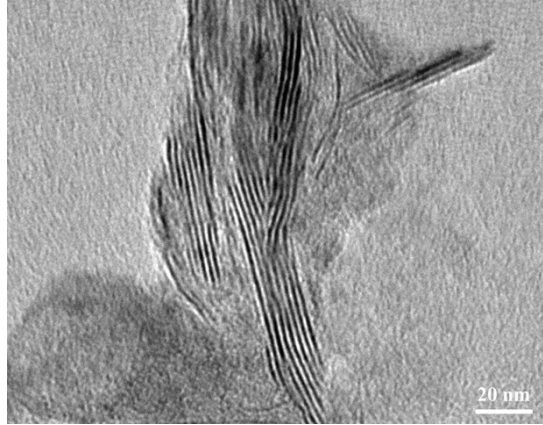

**Figure S16.** TEM image of the MoS<sub>2</sub>/Ti<sub>3</sub>C<sub>2</sub>T<sub>x</sub> MXene electrode after cycles.

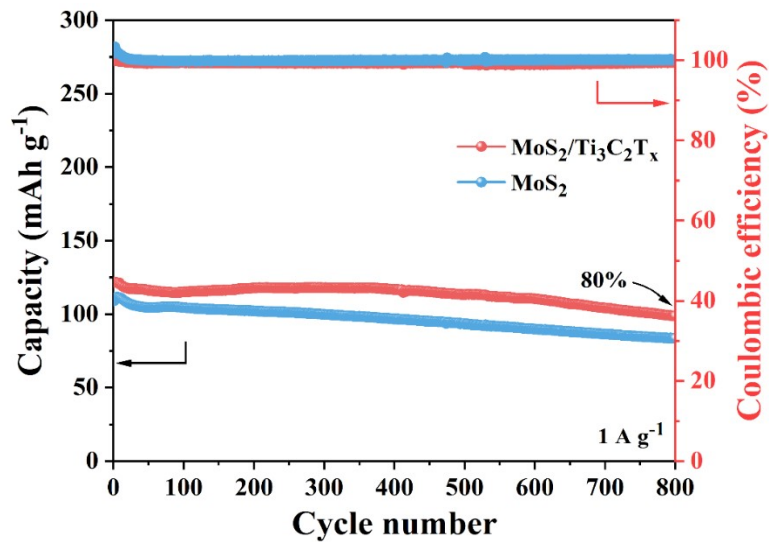

**Figure S17.** Long cycling performance of Zn//MoS<sub>2</sub>/Ti<sub>3</sub>C<sub>2</sub>T<sub>x</sub> batteries at 1.0 A g<sup>-1</sup>.

## References

- [1] J. Liu, N. Gong, W. Peng, Y. Li, F. Zhang, X. Fan, Vertically aligned 1 T phase MoS<sub>2</sub> nanosheet array for high-performance rechargeable aqueous Zn-ion batteries, *Chem. Eng. J.* 428 (2022) 130981.
- [2] Z. Zhang, W. Li, R. Wang, H. Li, J. Yan, Q. Jin, P. Feng, K. Wang, K. Jiang, Crystal water assisting MoS<sub>2</sub> nanoflowers for reversible zinc storage, *J. Alloy. Compd.* 872 (2021) 159599.
- [3] H. Liu, J.-G. Wang, W. Hua, Z. You, Z. Hou, J. Yang, C. Wei, F. Kang, Boosting zinc-ion intercalation in hydrated MoS<sub>2</sub> nanosheets toward substantially improved performance,



Energy Storage Mater. 35 (2021) 731-738.

- [4] M. Huang, Y. Mai, L. Zhao, X. Liang, Z. Fang, X. Jie, Hierarchical MoS<sub>2</sub>@CNTs hybrid as a long-life and high-rate cathode for aqueous rechargeable Zn-ion batteries, *ChemElectroChem* 7(20) (2020) 4218-4223.
- [5] M. Huang, Y. Mai, L. Zhao, X. Liang, Z. Fang, X. Jie, Tuning the kinetics of zinc ion in MoS<sub>2</sub> by polyaniline intercalation, *Electrochim. Acta* 388 (2021) 138624.
- [6] W. Xu, C. Sun, K. Zhao, X. Cheng, S. Rawal, Y. Xu, Y. Wang, Defect engineering activating (Boosting) zinc storage capacity of MoS<sub>2</sub>, *Energy Storage Mater.* 16 (2019) 527-534.
- [7] J. Liu, P. Xu, J. Liang, H. Liu, W. Peng, Y. Li, F. Zhang, X. Fan, Boosting aqueous zinc-ion storage in MoS<sub>2</sub> via controllable phase, *Chem. Eng. J.* 389 (2020) 124405.
- [8] L. Liu, W. Yang, H. Chen, X. Chen, K. Zhang, Q. Zeng, S. Lei, J. Huang, S. Li, S. Peng, High Zinc-Ion Intercalation Reaction Activity of MoS<sub>2</sub> Cathode Based on Regulation of Thermodynamic Metastability and Interlayer Water, *Electrochim. Acta*, 410 (2022) 140016.
- [9] C. Li, C. Liu, Y. Wang, Y. Lu, L. Zhu, T. Sun, Drastically-enlarged interlayer-spacing MoS<sub>2</sub> nanocages by inserted carbon motifs as high performance cathodes for aqueous zinc-ion batteries, *Energy Storage Mater.*, 49 (2022) 144-152.
- [10]. Cao, N. Chen, W. Tang, Y. Liu, Y. Xia, Z. Wu, F. Li, Y. Liu, A. Sun, Template-assisted hydrothermal synthesized hydrophilic spherical 1T-MoS<sub>2</sub> with excellent zinc storage performance, *Journal of Alloys and Compounds*, 898 (2022) 162854.
- [11] Z. Sheng, P. Qi, Y. Lu, G. Liu, M. Chen, X. Gan, Y. Qin, K. Hao, Y. Tang, Nitrogen-Doped Metallic MoS<sub>2</sub> Derived from a Metal-Organic Framework for Aqueous Rechargeable Zinc-Ion Batteries, *ACS Appl. Mater. Inter.*, 13 (2021) 34495-34506.
- [12] M. Huang, Y. Mai, G. Fan, X. Liang, Z. Fang, X. Jie, Toward fast zinc-ion storage of MoS<sub>2</sub> by tunable pseudocapacitance, *J. Alloys Compd.*, 871 (2021) 159541.
- [13] H. Jia, M. Qiu, B. Tawiah, H. Liu, S. Fu, Interlayer-expanded MoS<sub>2</sub> hybrid nanospheres with superior zinc storage behavior, *Compos. Commun.*, 27 (2021) 100841.
- [14] Y.Q. Jin, H. Chen, L. Peng, Z. Chen, L. Cheng, J. Song, H. Zhang, J. Chen, F. Xie, Y. Jin, J. Shi, H. Meng, Interfacial polarization triggered by glutamate accelerates dehydration of

hydrated zinc ions for zinc-ion batteries, Chem. Eng. J., 416 (2021) 127704.

- [15] Y.-T. Wang, Z.-Z. Zhang, M.-X. Li, One-Pot Synthesis of 1T MoS<sub>2</sub>/MWCNT Hybrids for Enhanced Zinc-Ion Storage, Nano Futures, 6 (2022) 025001.
